# Supplementary material for: Reduction of diabetes-related distress predicts improved depressive symptoms: A secondary analysis of the DIAMOS study
Source: PubMed Central journal article supplement (PMC5507326; doi:10.1371/journal.pone.0181218), 2017-07-10

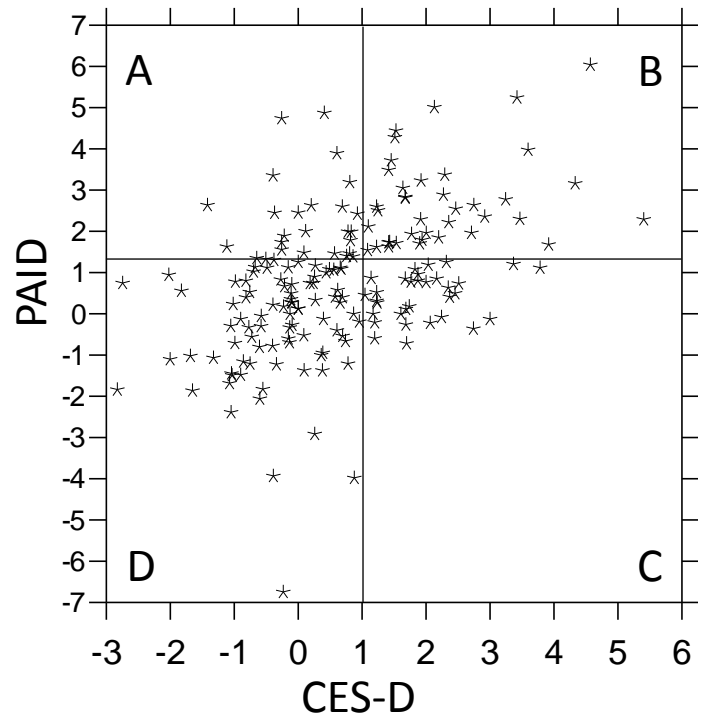

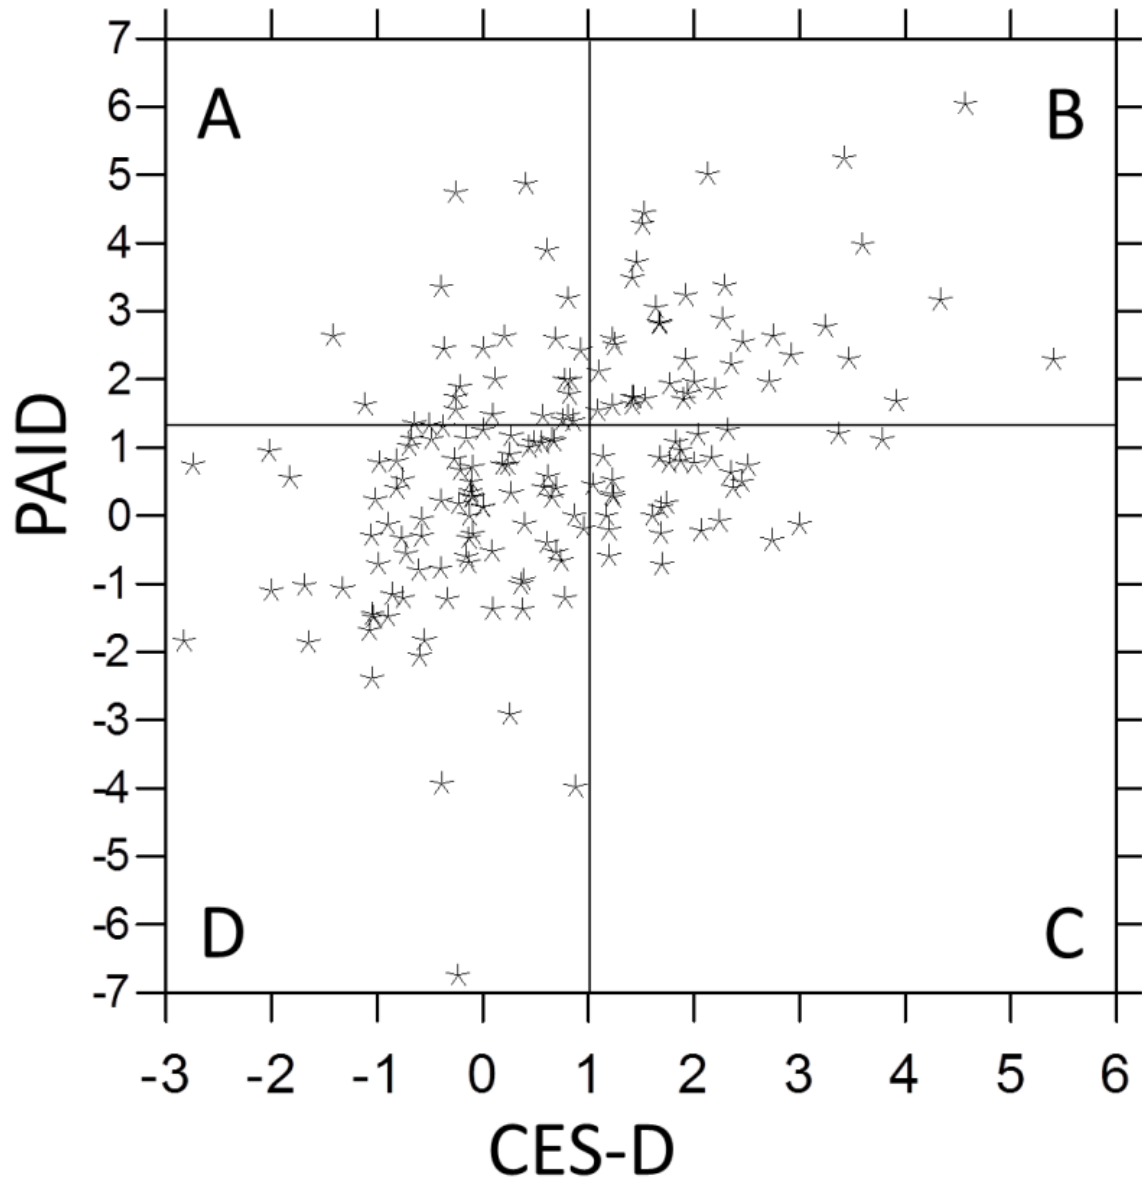

Supplement: pone.0181218.s002.pdf [file pone.0181218.s002.pdf]
